# Supplementary figures and images for: Efficacy and safety in patients with haemophilia A switching to octocog alfa (BAY 81–8973): Final results of the global real‐world study, TAURUS
Source: PubMed Central journal article supplement — Eur J Haematol. 2022 Oct 17;110(1):77–87. doi: 10.1111/ejh.13876 (PMC10092432; doi:10.1111/ejh.13876), 2022-10-17

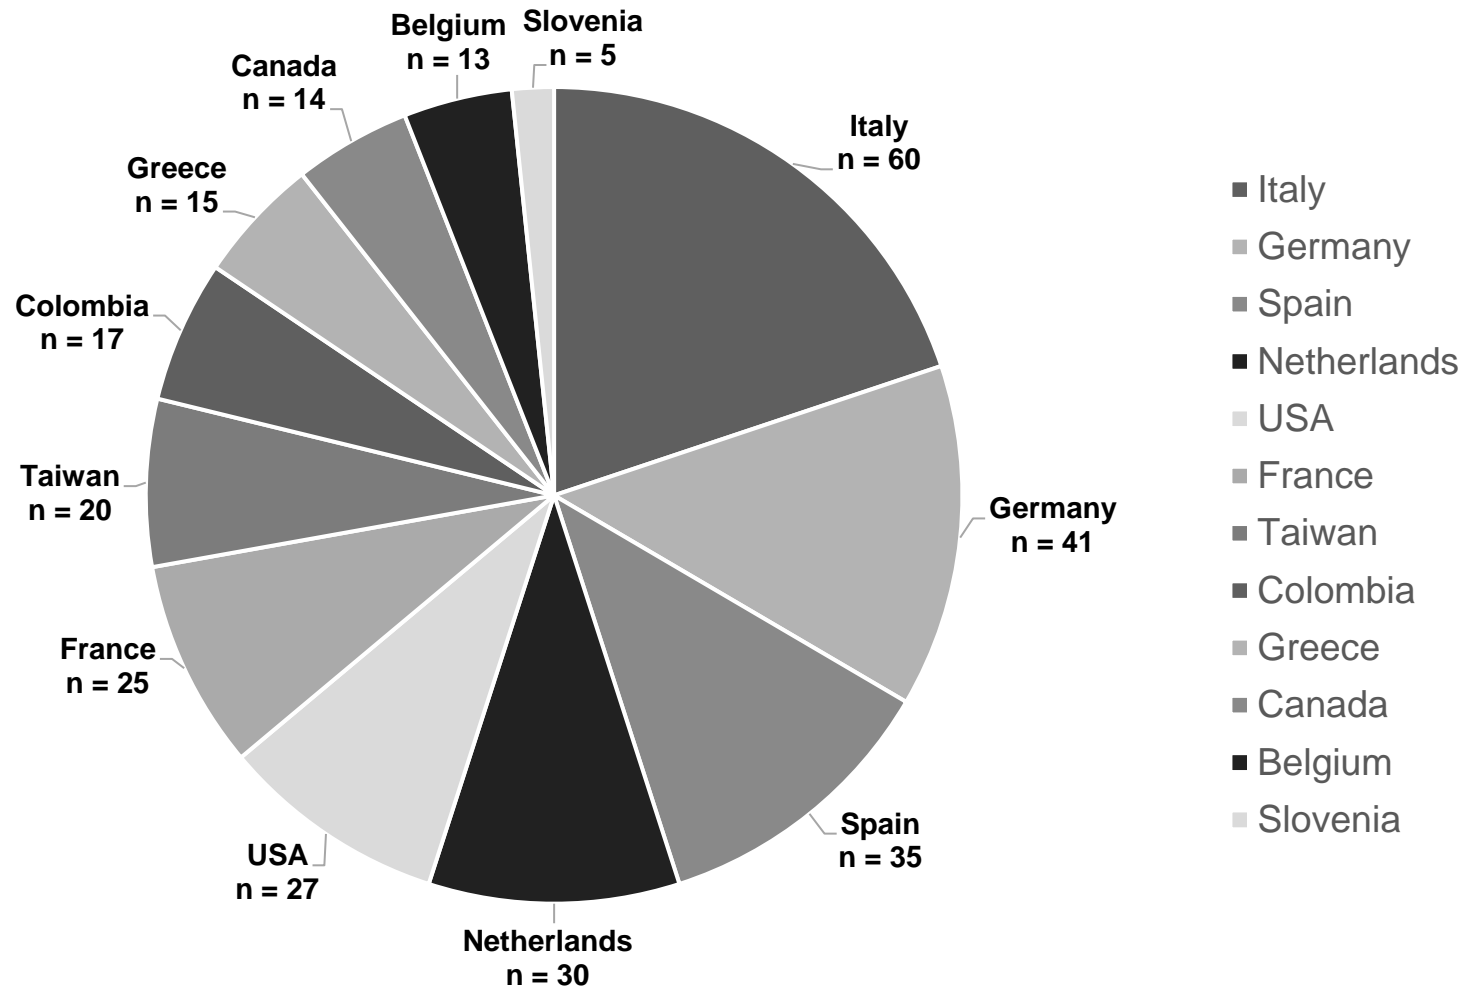

Supplement: EJH-110-77-s001.pdf [file EJH-110-77-s001.pdf]
